# Supplementary material
Source: PubMed Central journal article supplement (PMC7613947)
Supplement: EMS157618-supplement-157618_Sup_Material.pdf [file EMS157618-supplement-157618_Sup_Material.pdf]

# SI Figure 1

## Processed and raw data of phospho-kinase array used for the quantification of Figure 1c

### Processed results

**a**

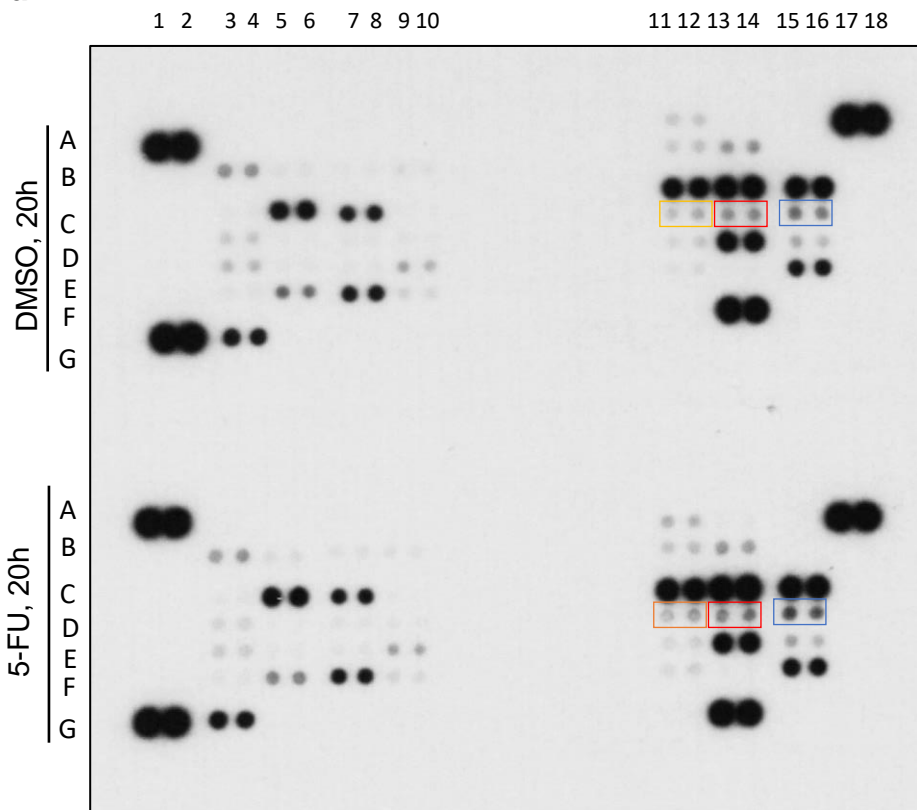

**b**

- A1, A2 = Reference spot
- A11, A12 = Akt 1/2/3 (T308)
- A13,14 = Akt 1/2/3 (S473)
- A17,18 = Reference spot
- B3,B4 = CREB (S133)
- B5,B6 = EGFR (Y1086)
- B7,B8 = eNOS (S1177)
- B9, B10 = ERK1/2 ((T202/Y204, T185/Y187)
- B11, B12 = Chk-2 (T68)
- B13, B14 = c-Jun (S63)
- C3, C4 = Fgr (Y412)
- C5, C6 = GSK-3 $\alpha$ / $\beta$  (S21/S9)
- C7, C8 = GSK-3 $\beta$  (S9)
- C9, C10 = HSP27 (S78/S82)
- C11, C12 = p53 (S15)
- C13,C14 = p53 (S46)
- C15,C16 = p53 (S392)
- D3, D4 = JNK 1/2/3 (T183/Y185, T221/Y223)
- D5, D6 = Lck (Y394)
- D9, D10 = MSK1/2 (S376/S360)
- D11, D12 = p70 S6 Kinase (T389)
- D13, D14 = p70 S6 Kinase (T421/S424)
- D15, D16 = PRAS40 (T246)
- E3, E4 = p38 $\alpha$  (T180/Y182)
- E5, E6 = PDGFR $\beta$  (Y751)
- E7, E8 = PLC- $\gamma$ 1 (Y783)
- E9, E10 = Src (Y419)
- E11, E12 = PYK2 (Y402)
- E13, E14 = RSK1/2 (S221/S227)
- E15, E16 = RSK1/2/3 (S380/S386/S377)
- F3, F4 = STAT2 (Y689)
- F5, F6 = STAT5a/b (Y694/Y699)
- F7, F8 = WNK1 (T60)
- F9, F10 = Yes (Y426)
- F11, F12 = STAT1 (Y701)
- F13, F14 = STAT3 (Y05)
- F15, F16 = STAT3 ((S727)
- G1, G2 = Reference spot
- G3, G4 =  $\beta$ -Catenin
- G9, G10 = PBS (negative control)
- G11, G12 = STAT6 (Y641)
- G13, G14 = HSP60
- G17, G18 = PBS (negative control)

### Raw data

**c**

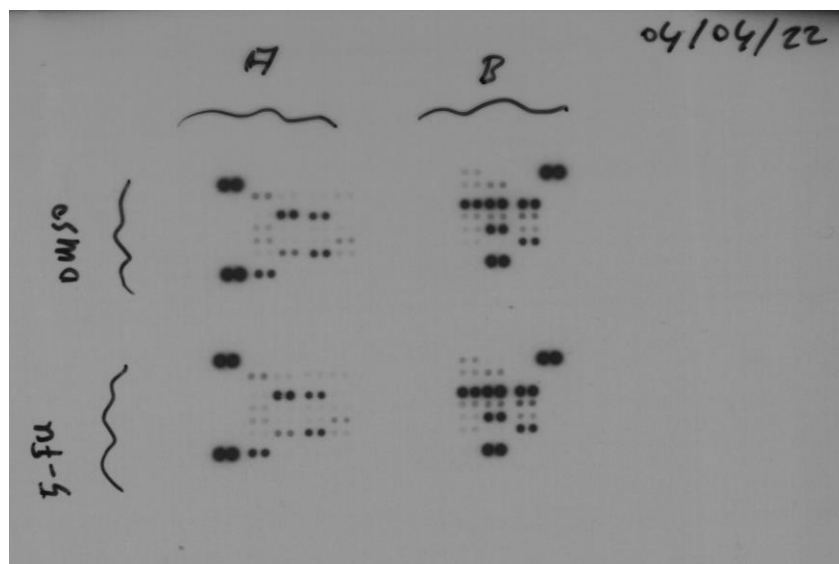

**SI Figure 2**

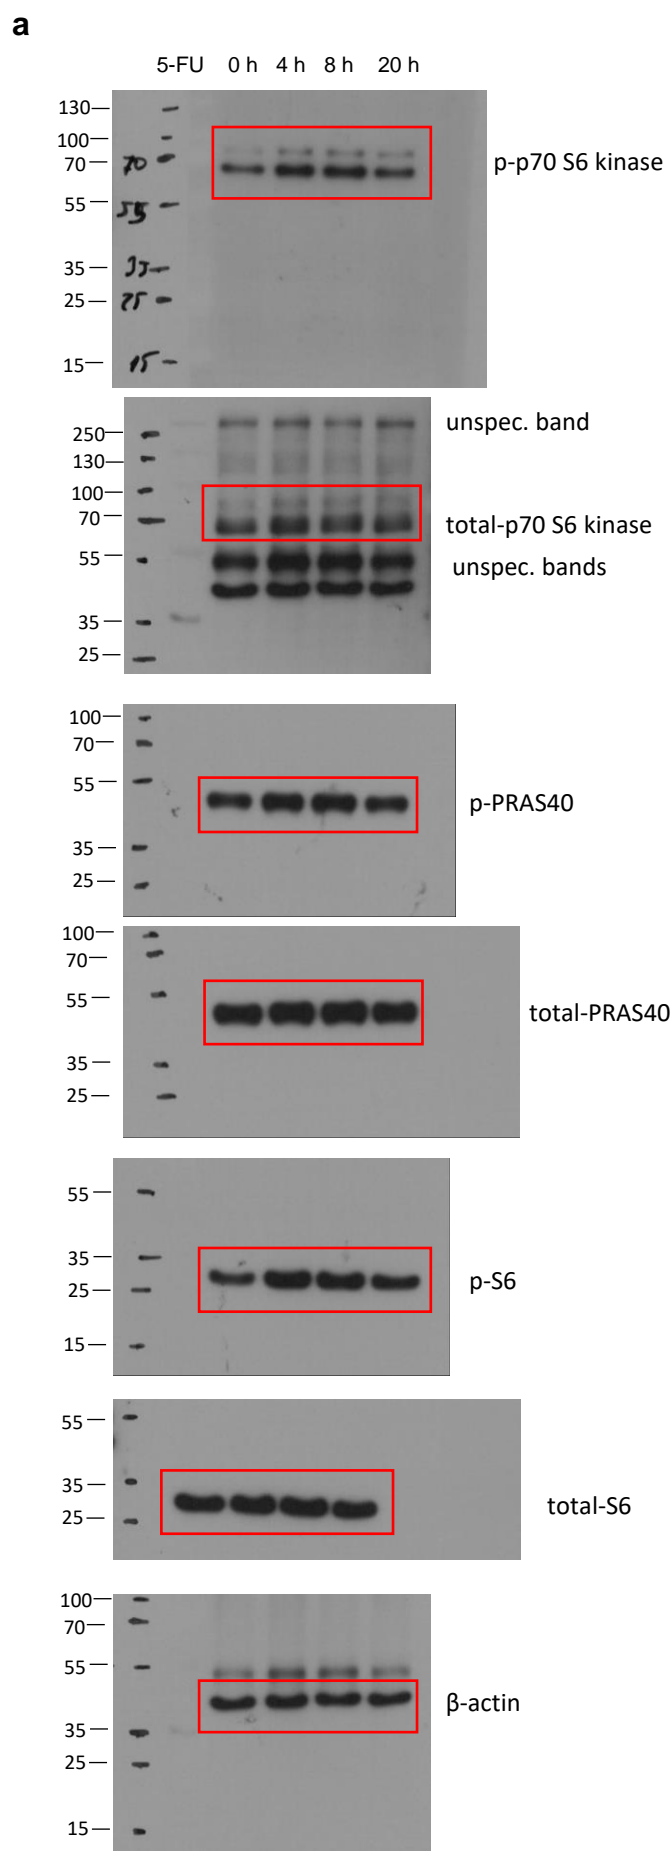

Immunoblot scans for Figure 1d

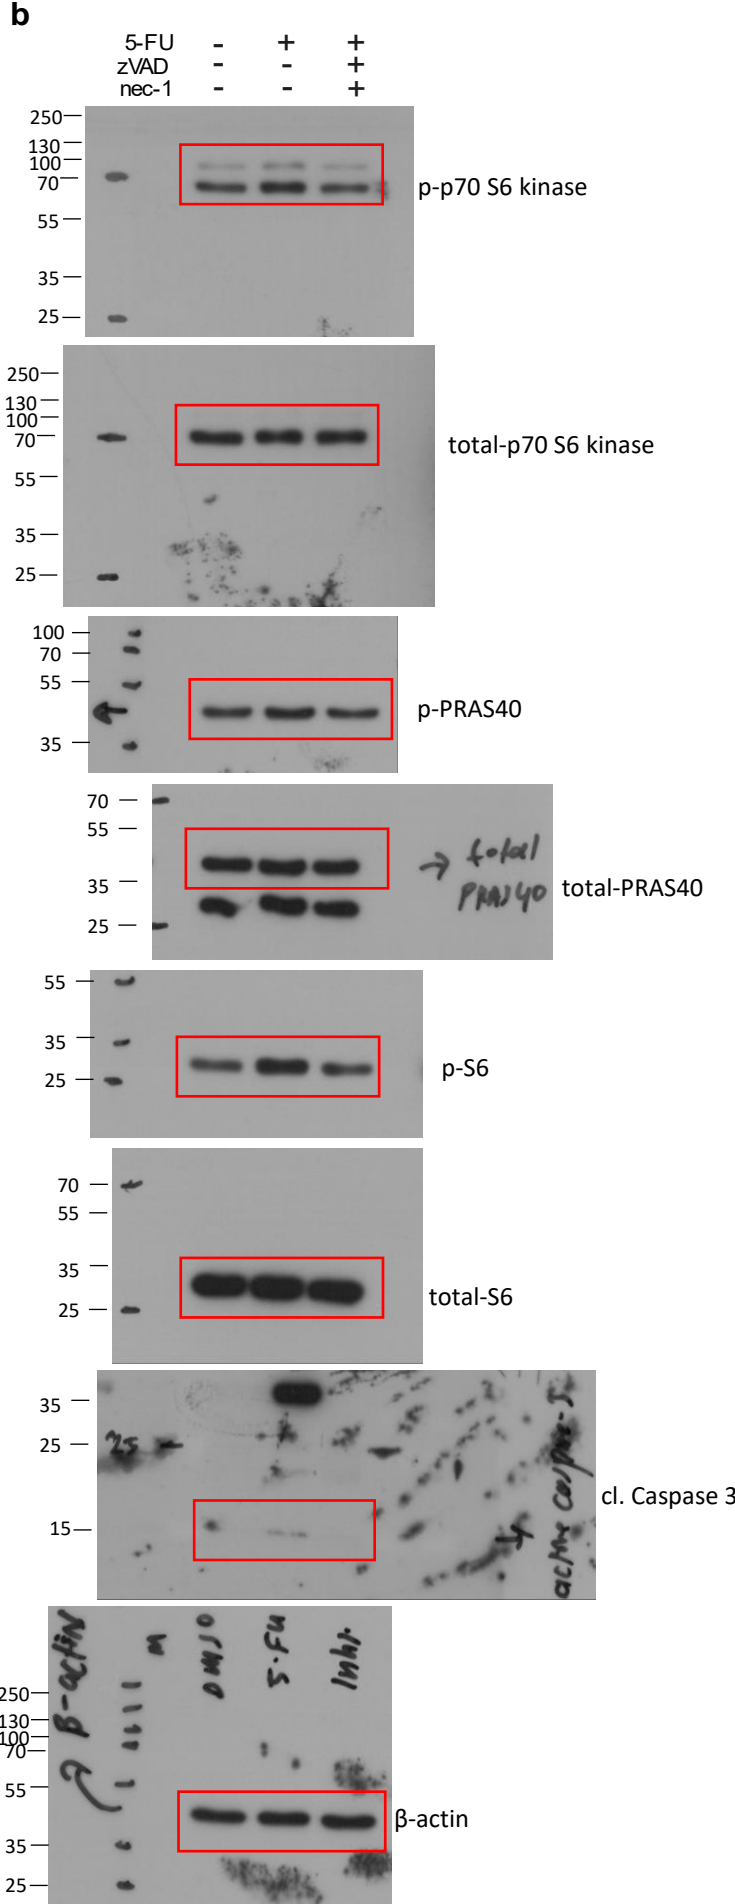

Immunoblot scans for Figure 1e

# SI Figure 3

**a**

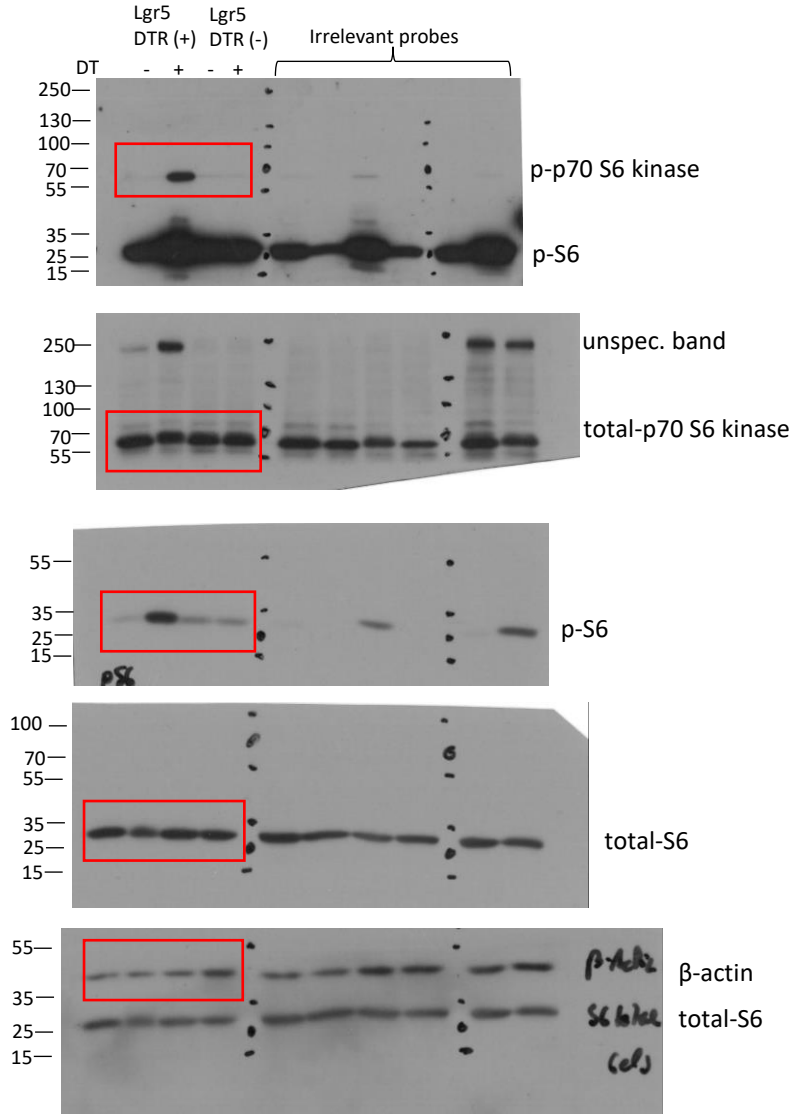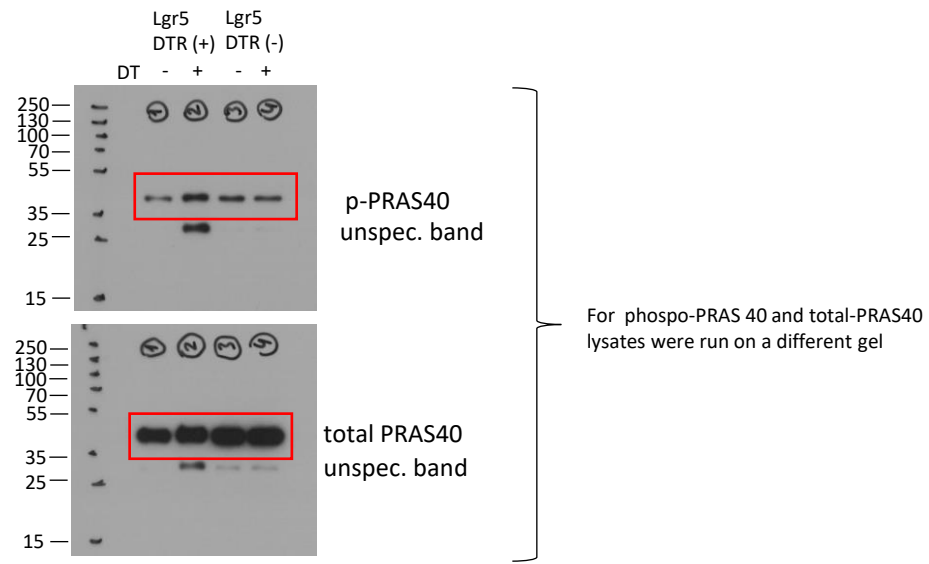

**Immunoblot scans for Figure 2a**

# SI Figure 4

a

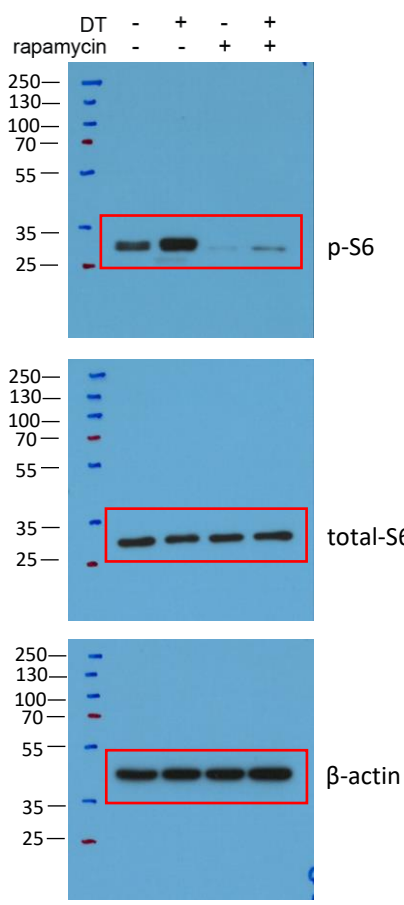

Immunoblot scans for Figure 2g

# SI Figure 5

**a**

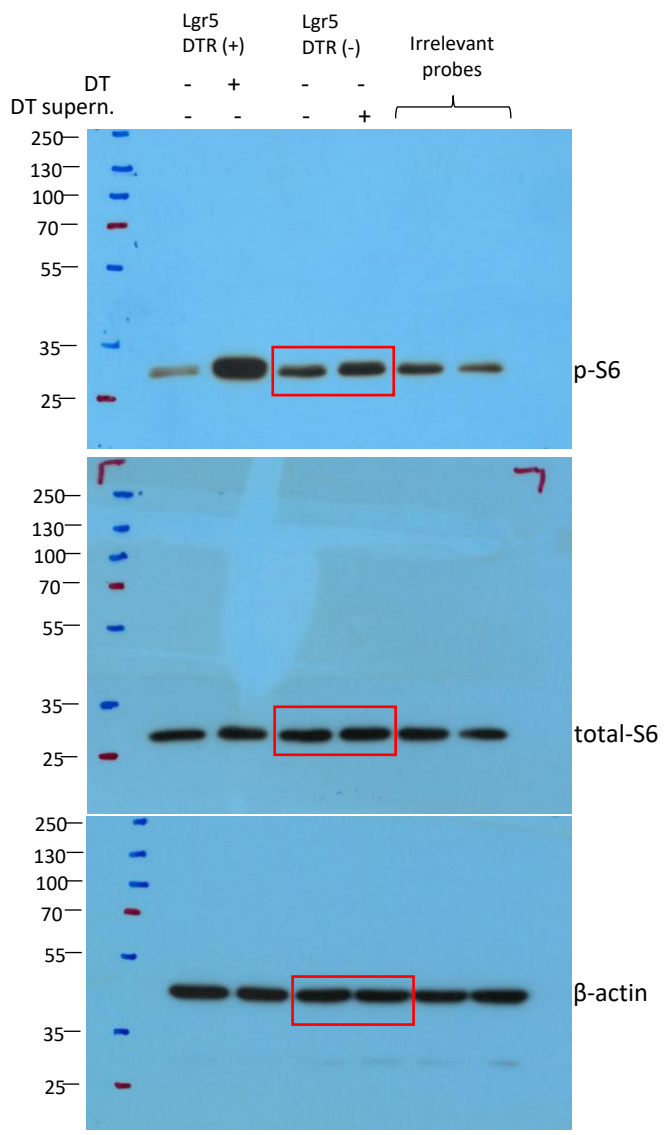

**Immunoblot scans for Figure 3a**

# SI Figure 6

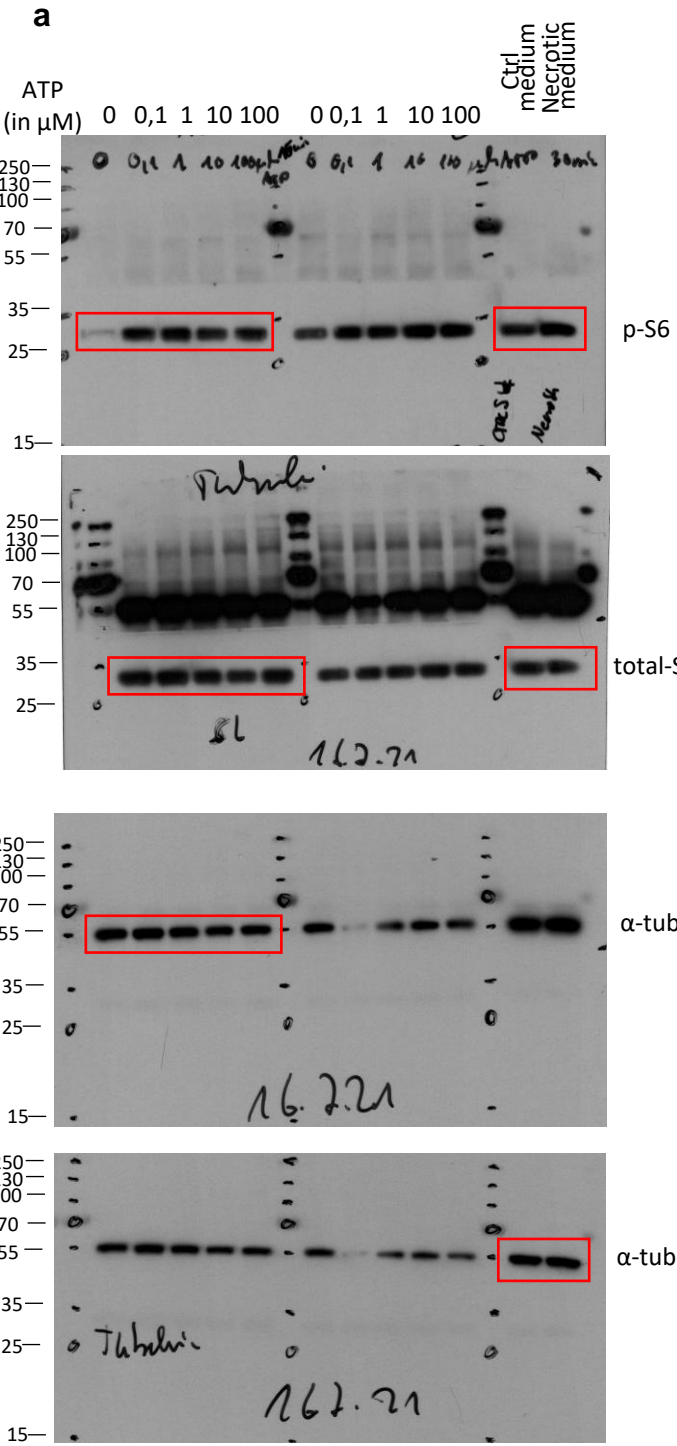

Immunoblot scans for Figure 3c and e

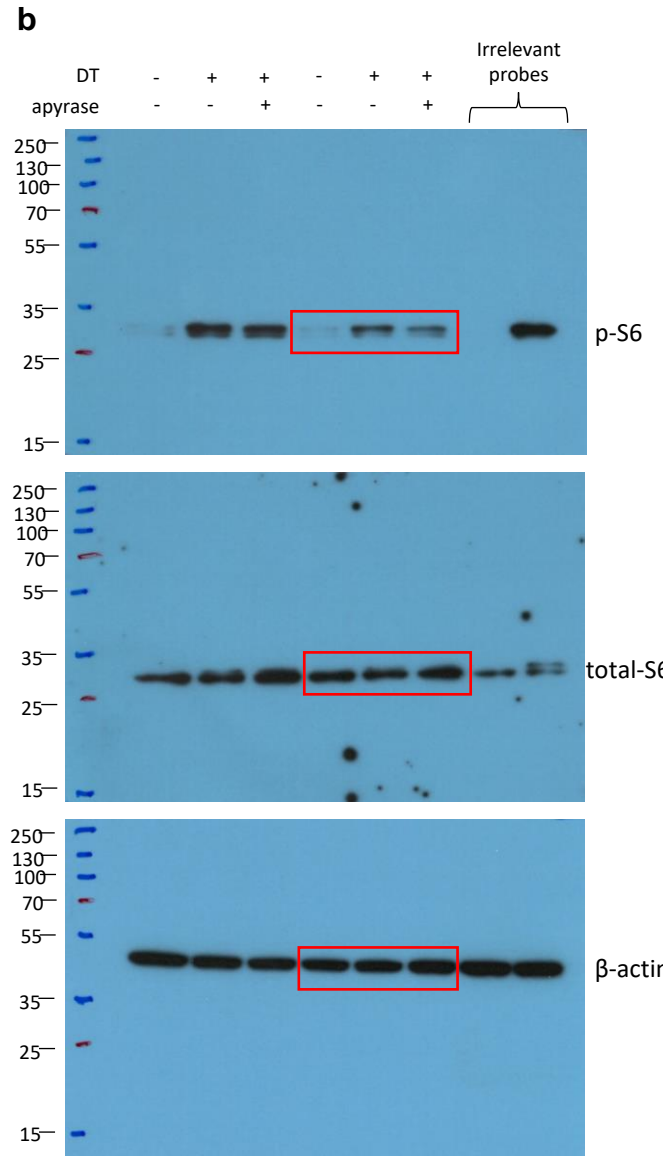

Immunoblot scans for Figure 3f

# SI Figure 7

**a**

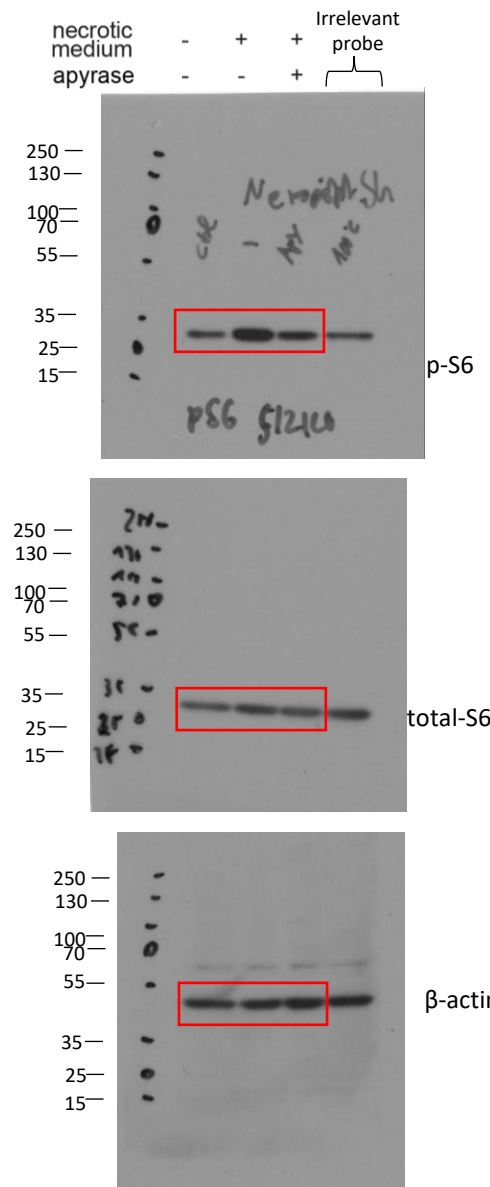

**b**

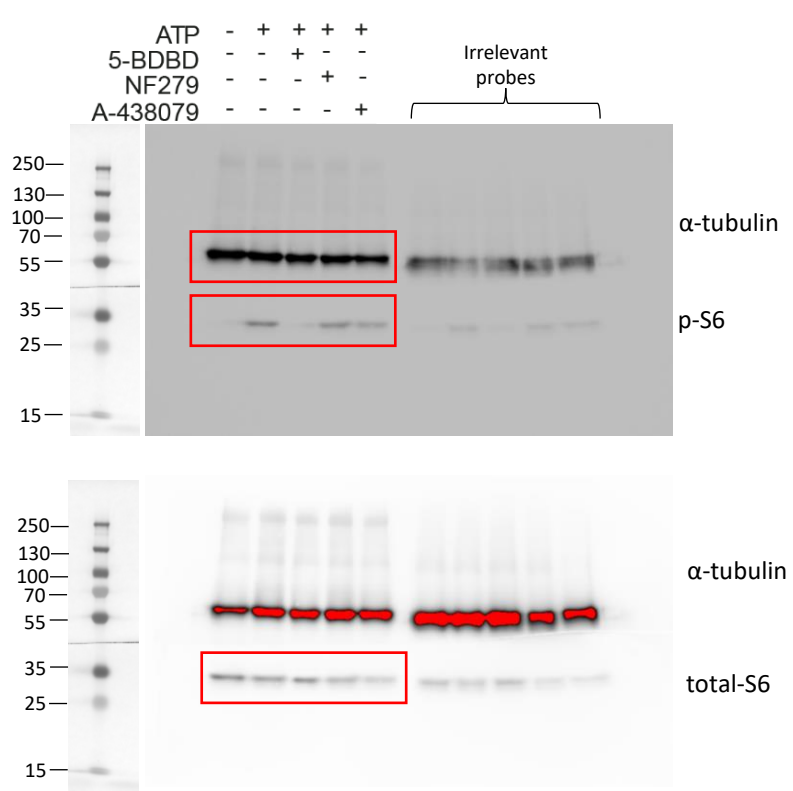

Immunoblot scans for Figure 3j

Immunoblots for Figure 3g

**c**

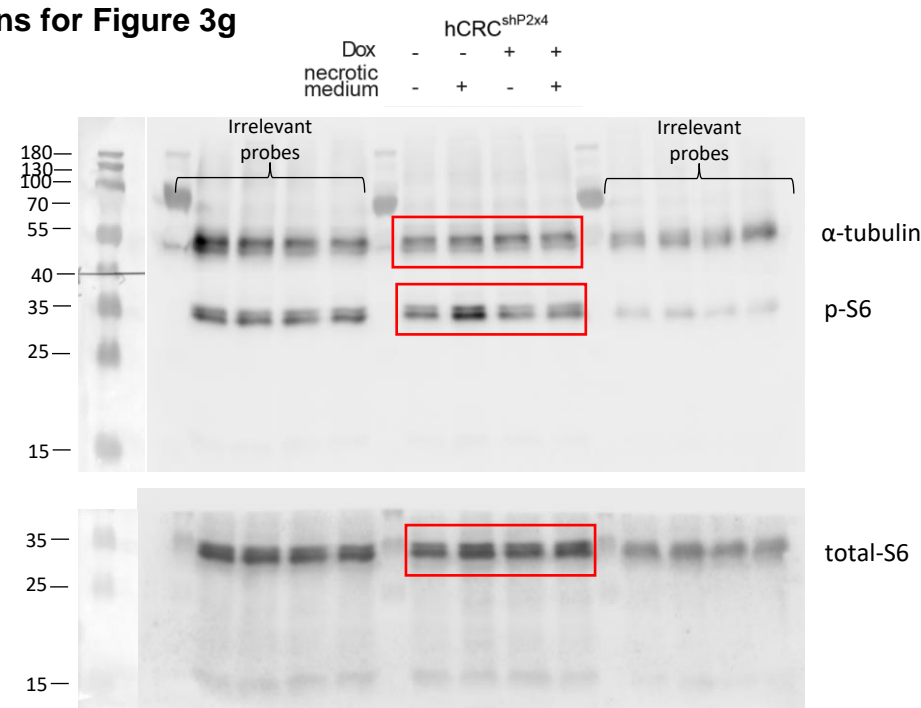

Immunoblot scans for Figure 3i

# SI Figure 8

**a**

|           |   |   |   |   |   |
|-----------|---|---|---|---|---|
| DT        | - | + | + | + | + |
| rapamycin | - | - | + | - | + |
| NAC       | - | - | - | + | + |

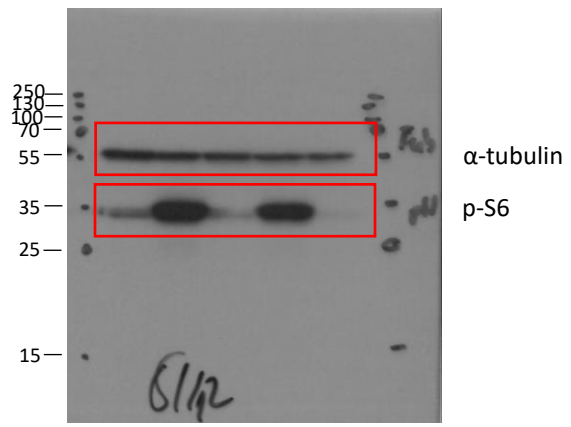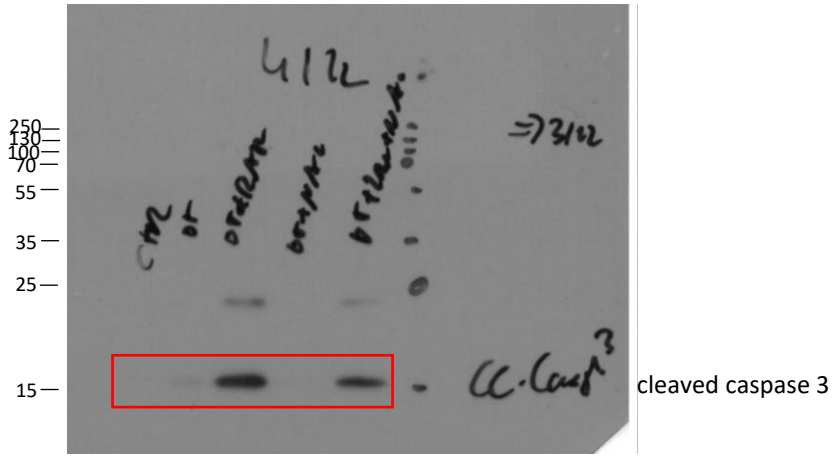

|           |   |   |   |   |   |   |   |   |   |   |
|-----------|---|---|---|---|---|---|---|---|---|---|
| DT        | - | + | + | + | + | - | + | + | + | + |
| rapamycin | - | - | + | - | + | - | - | + | - | + |
| NAC       | - | - | - | + | + | - | - | - | + | + |

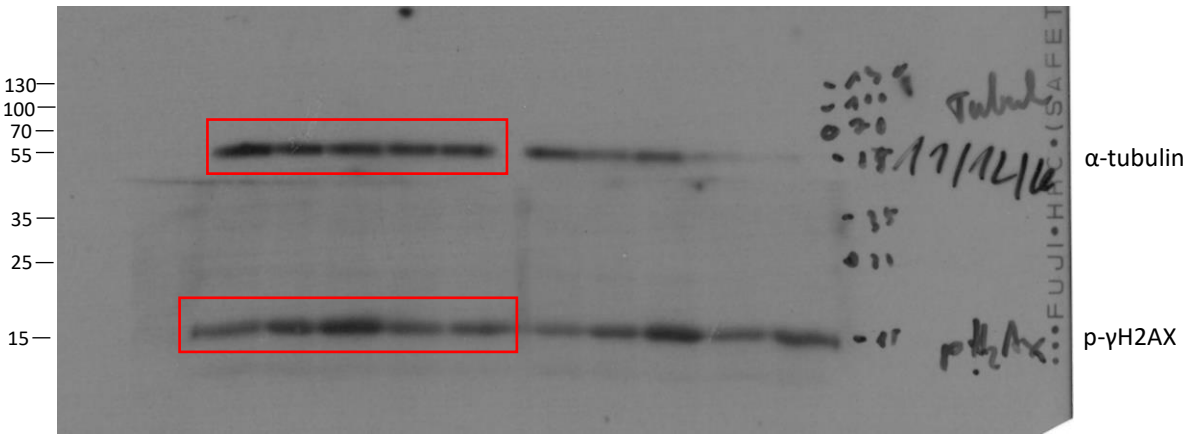

For pγH2AX detection samples had to be reloaded on a separate gel

**Immunoblot scans for Figure 4f**



# SI Figure 9

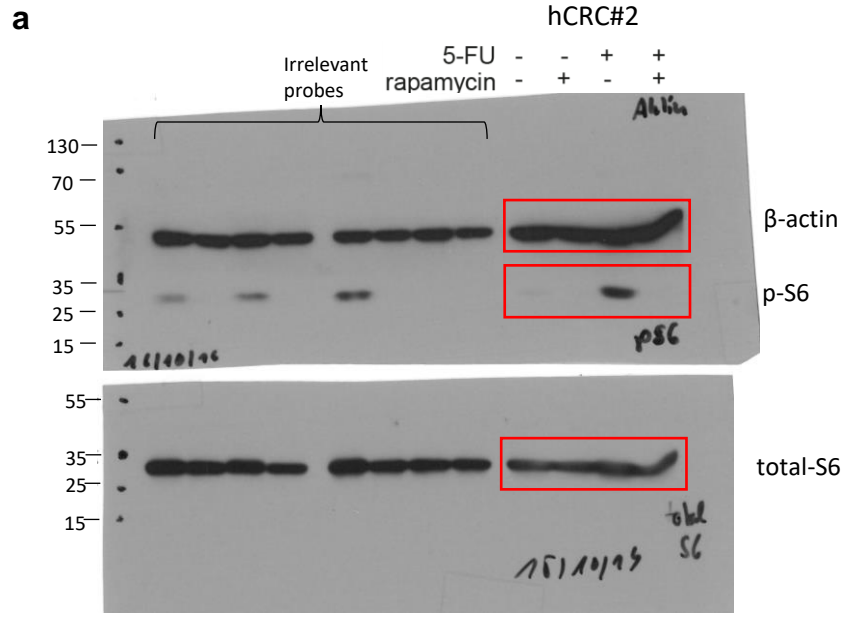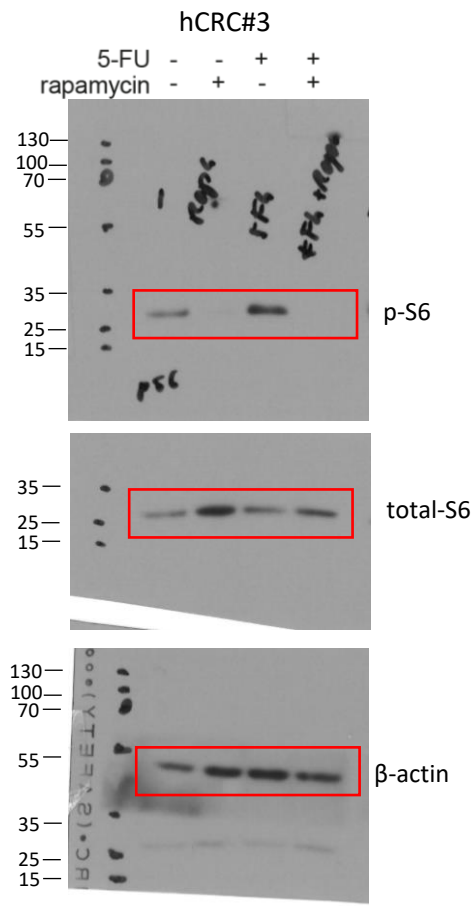

Immunoblot scans for Extended data Figure 1a

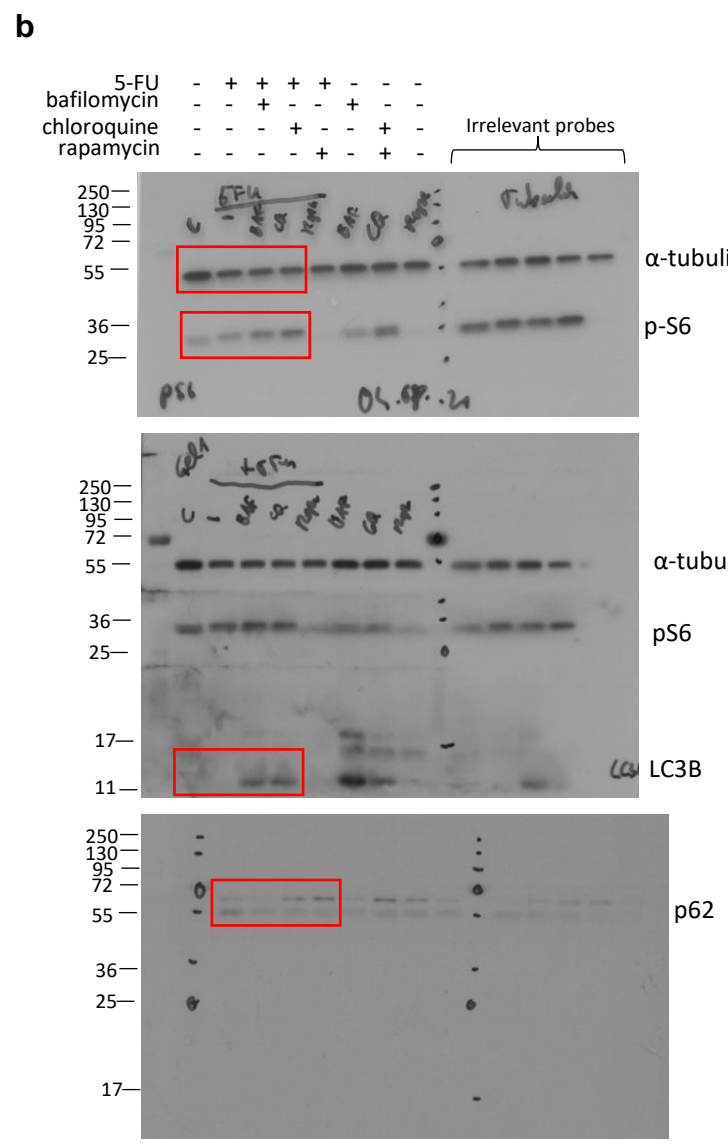

Immunoblot scans for Extended data Figure 1i

# SI Figure 10

a

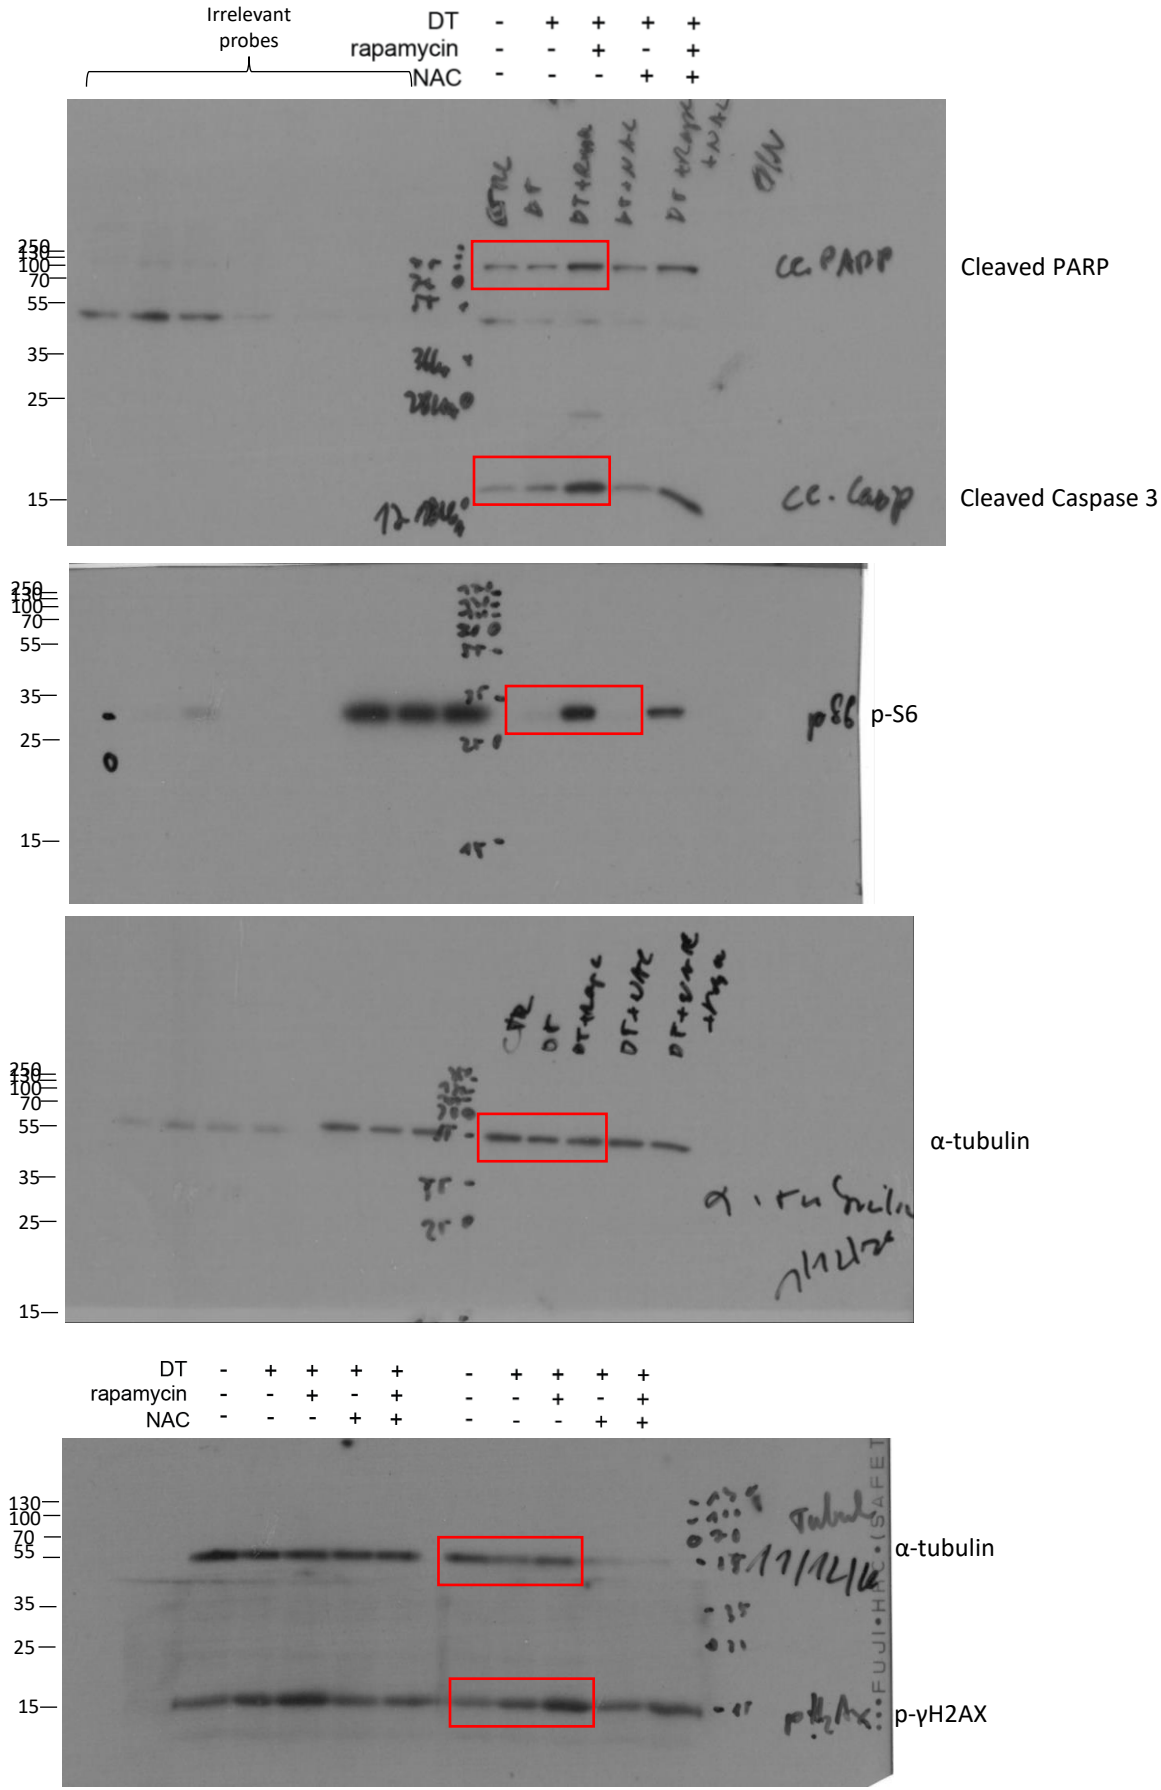

For pγH2AX detection samples had to be reloaded on a separate gel (separated by grid lines in the Figure)

Immunoblot scans for Extended data Figure 2b

**SI Figure 11**

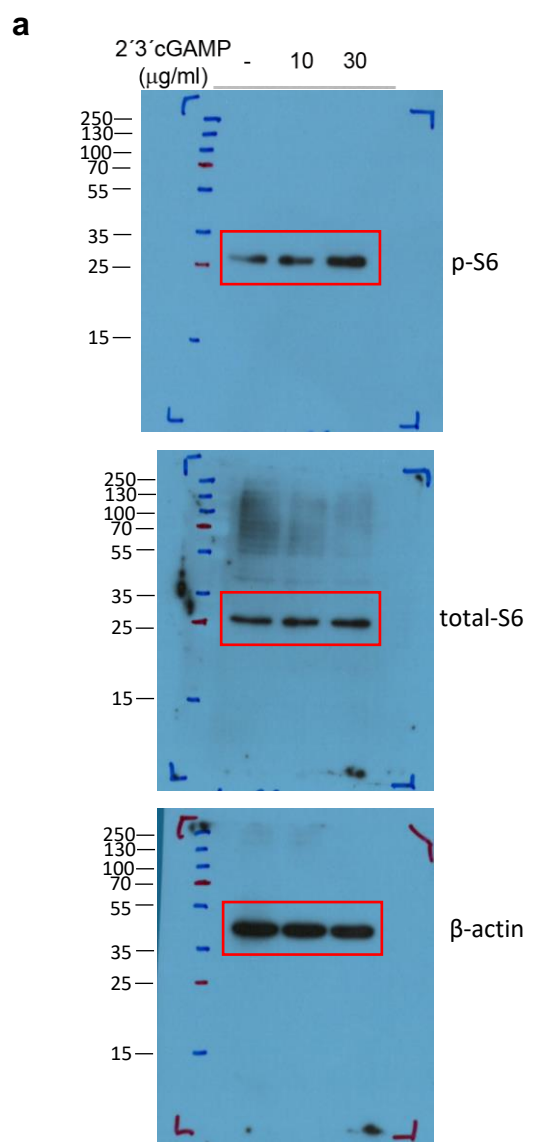

**Immunoblot scans for Extended data Figure 3c**

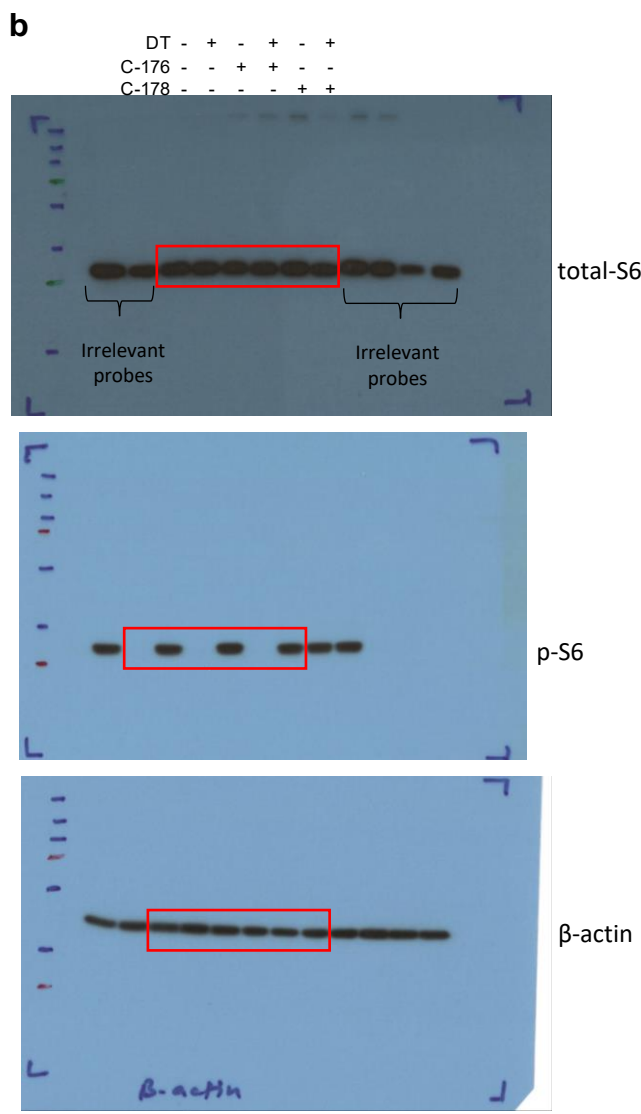

**Immunoblot scans for Extended data Figure 3d**

# SI Figure 12

a

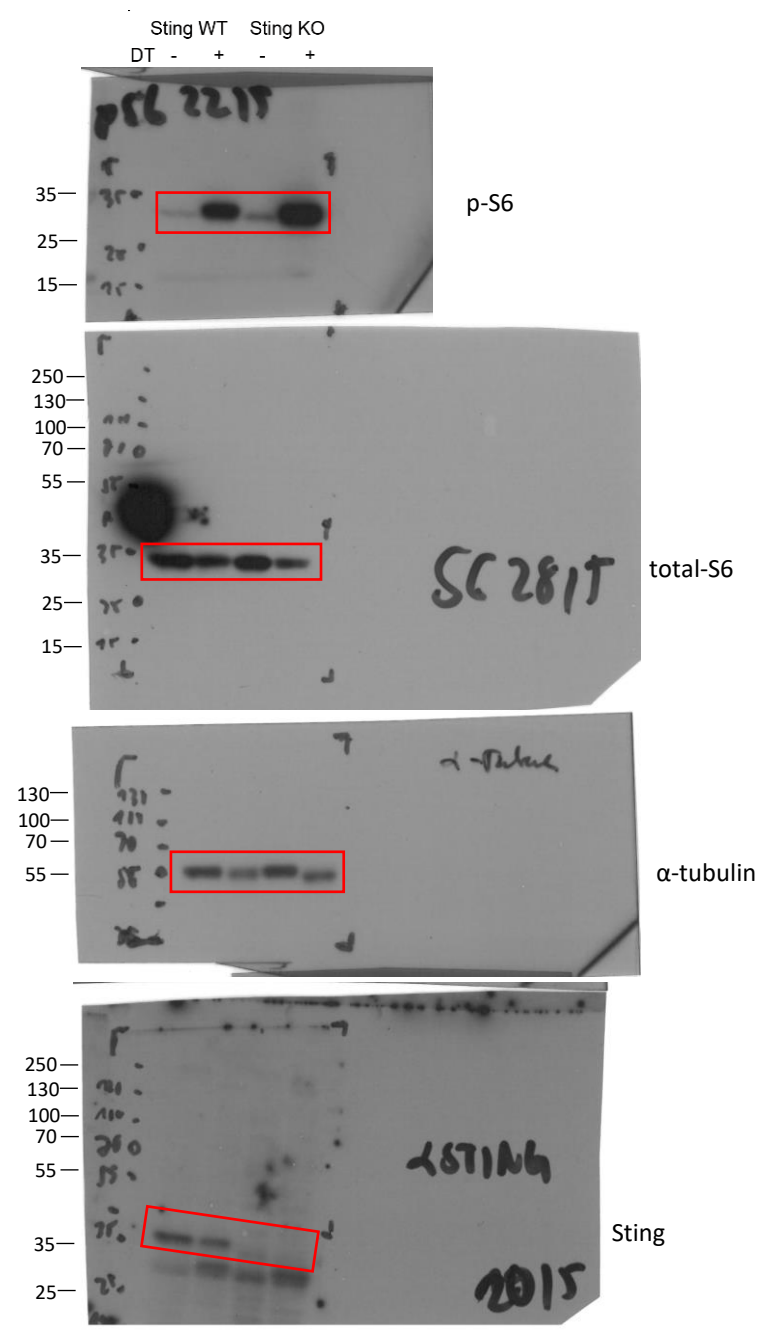

Immunoblot scans for Extended data Figure 3e

# SI Figure 13

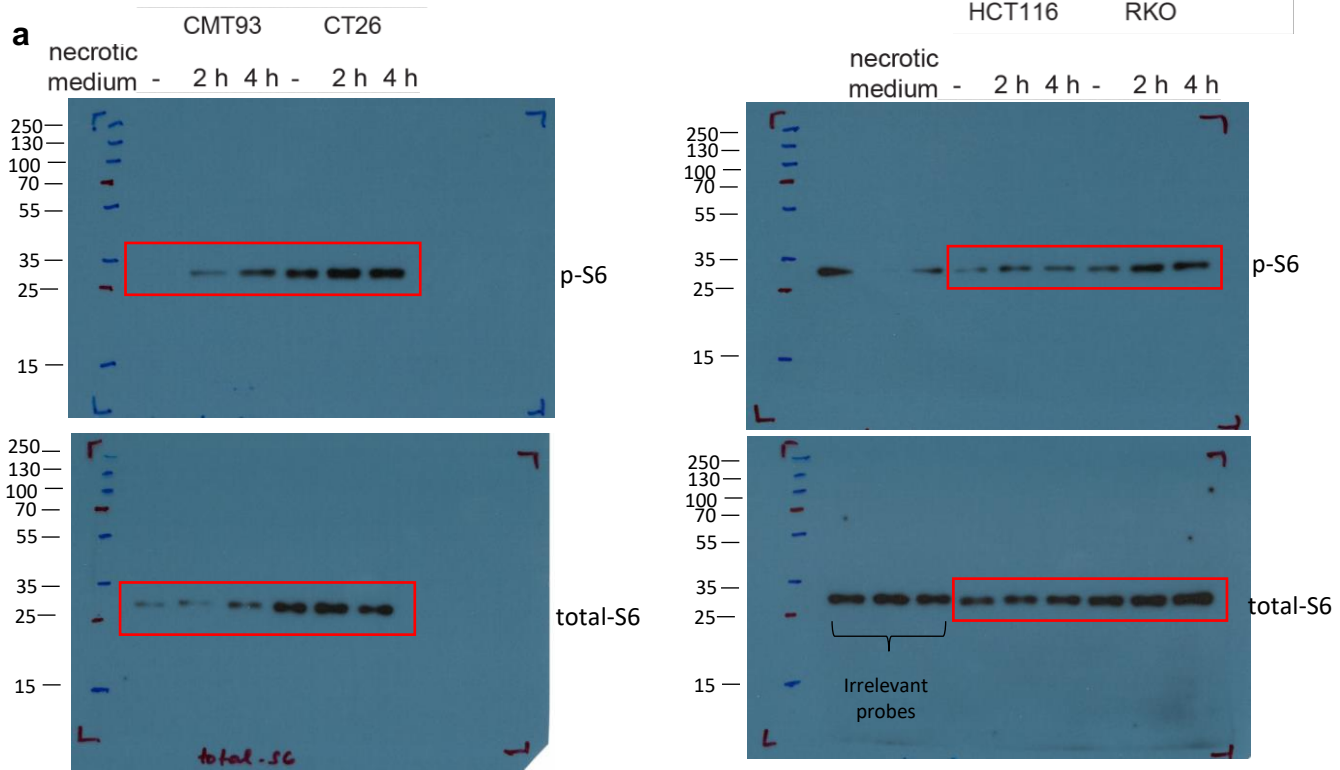

Immunoblot scans for Extended data Figure 3f

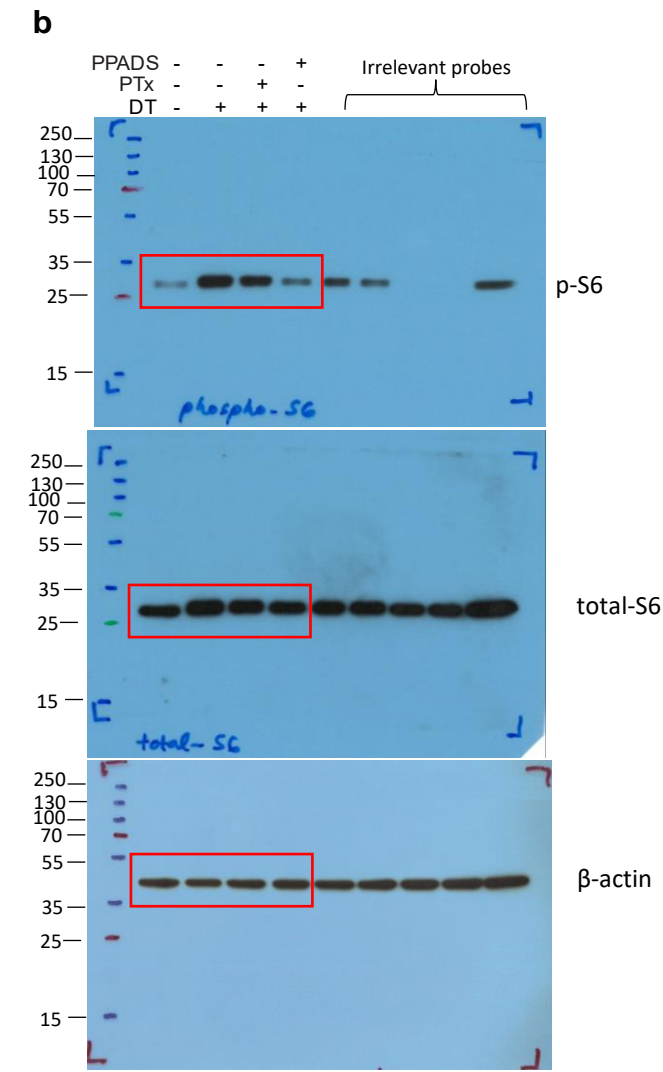

Immunoblot scans for Extended data Figure 3g

# SI Figure 14

**a**

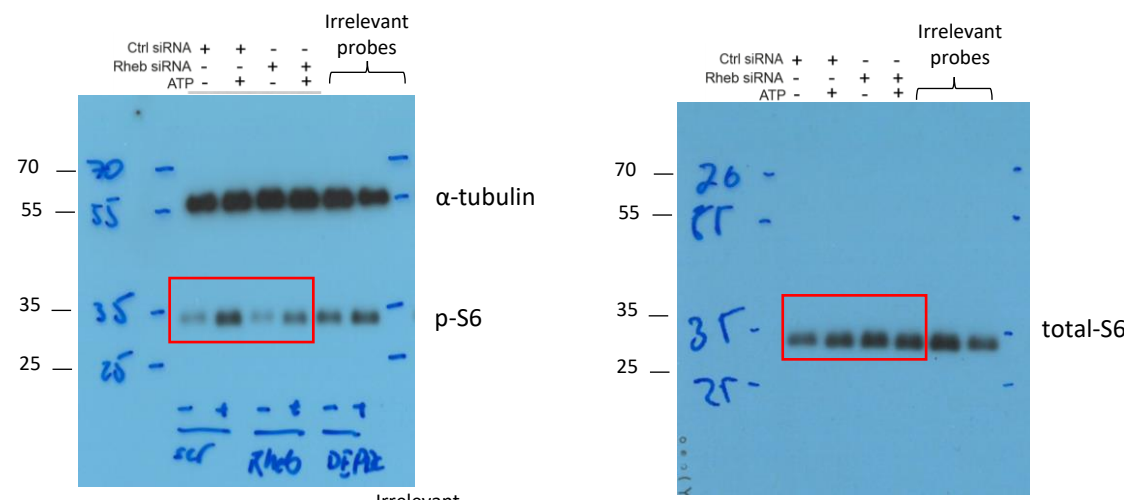

**Immunoblot scans for Extended data Figure 3h**

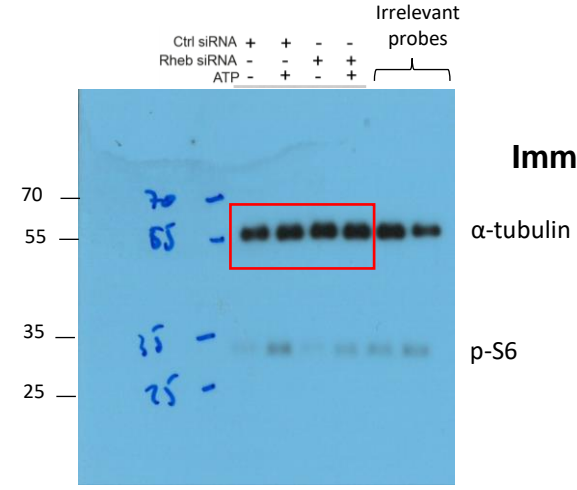

**b**

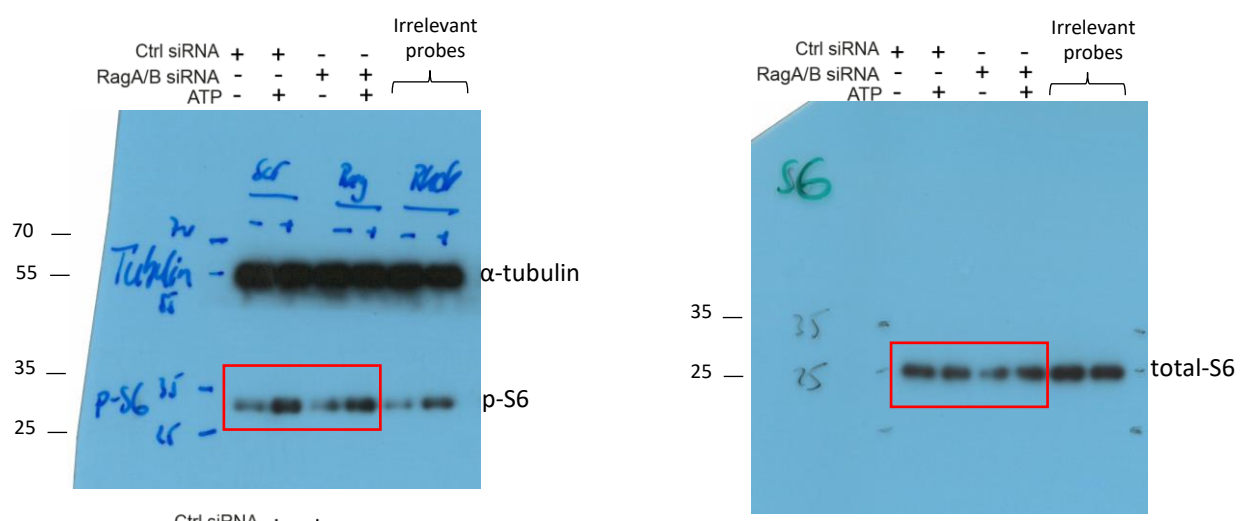

**Immunoblot scans for Extended data Figure 3i**

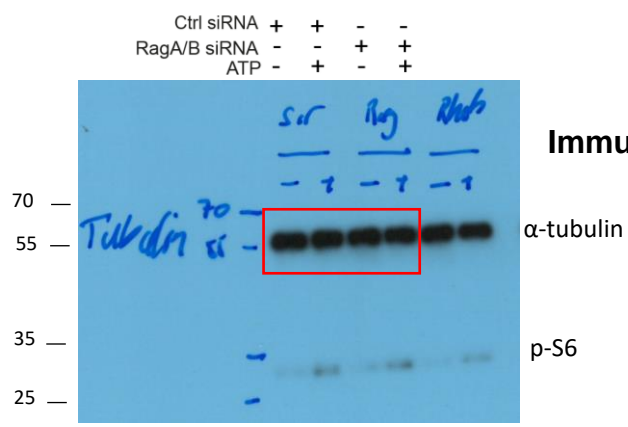

# SI Figure 15

a

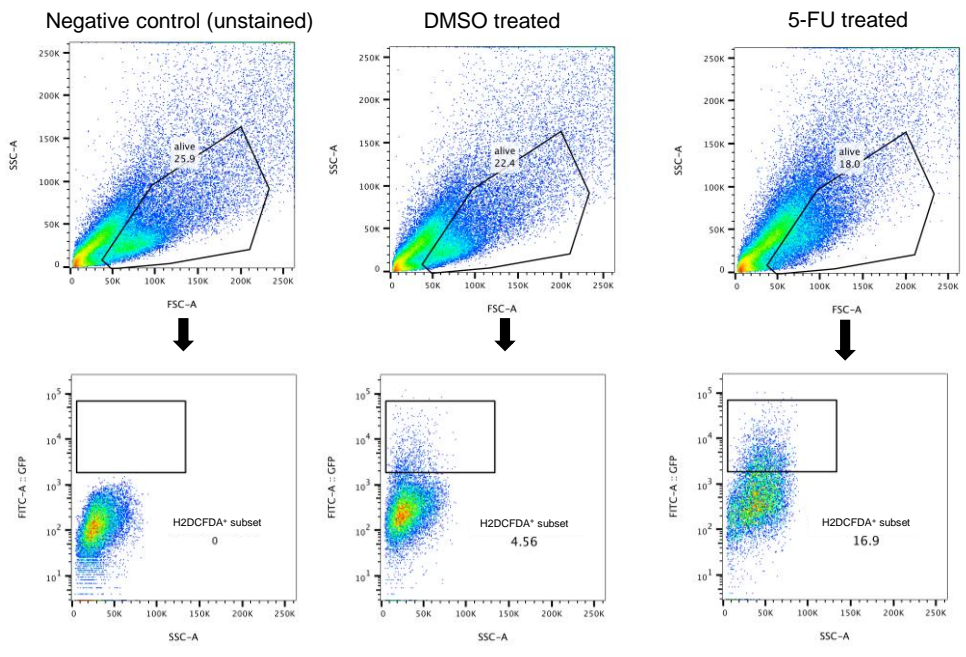

Representation of flow cytometry gating strategy for assessment of H2DCFDA+ cells from Figure 4e

# SI Table 1

Oligo sequences used in this study

| Target      | Forward primer          | Reverse primer           |
|-------------|-------------------------|--------------------------|
| Isg15       | ACCCTTCCAGTCTGGGTCT     | TCGCTGCAGTTCTGTACCAC     |
| Infar1      | CACGGTCGCTGTAGAAGTAAAG  | TCTCCTCCTCTTCGTTGGAATA   |
| Mx1         | ATGTCAGCTCCCCAAATGTCC   | TGCCTACAGCCACCCTGG       |
| Ifit1       | GCTTTGCGAAGGCTCTGAAA    | TGGCGATAGGCTACGACTGC     |
| Ifit2       | CACCTCTGGACTGGCAATAGC   | AGAGGGTCAATGGCGTTCTG     |
| Ifitm1      | TCTTCACCATCCTCACGGC     | TGTTGCAAGACATCTCACATCATC |
| C2ta        | GACAGAGCGCCAGCTAGCC     | CTCTCCTGGTCGCCTGCA       |
| Irf1        | GCTACCTGGGTCAGGACTTG    | CAGAGAGACTGCTGCTGACG     |
| Oas         | CAAGGTGGTGAAGGGTGGC     | TCAAAGCTGGTGAGATTGTTAAGG |
| Cyclophilin | ATGGTCAACCCCACCGTGT     | TTCTGCTGTCTTTGGAACTTTGTG |
| RagA        | GAACCTGGTGCTGAACCTGT    | GATGGCTTCCAGACACGATT     |
| RagB        | TTCGATTTCTGGGAAACCTG    | AGTTCACGGCTCTCCACATC     |
| Rheb        | GGCAAGTTGTTGGATATGGTGGG | CCAAGATTCTGCCAAAGCCTTTC  |
| hRaptor     | GGACCTGGCTGTTGACATCT    | TGCACTTGGCTTAACAGCAC     |
| hRictor     | CGGTTGTAGGTTGCCAGTTT    | CATGAGGGTGGCAAGAAAGT     |
| hP2RX1      | GCTACGTGGTGCAAGAGTCA    | GTAGTTGGTCCCCTTCTCCA     |
| hP2RX2      | GTCCTTTCCATCTCACTGG     | GGAAGTGAGCAGCCCTGTAG     |
| hP2RX3      | ACAGCCAGGGACATGAAGAC    | AGCCGGGTGAAGGAGTATT      |
| hP2RX4      | GAGATTCCAGATGCGACC      | GACTTGAGGTAAGTAGTGG      |
| hP2RX5      | CTGGTCGTATGGGTGTTCT     | CTGGGCTGGAATGACGTAGT     |
| hP2RX6      | ACTCTGTGTGGAGGGAGCTG    | GGCAAGTGGGTGTCAGAACT     |
| hP2RX7      | AAGCTGTACCAGCGGAAAGA    | GCTCTTGGCCTTCTGTTTTG     |
| hP2RY1      | AAAAGTAGCCCCCTGCAACT    | GATCTGATGCCGGATGAACT     |
| hP2RY2      | CCACCTGCCTTCTACTAGC     | TGGGAAATCTCAAGGACTGG     |
| hP2RY4      | CGTCTTCTCGCTCCGCTCTCT   | GCCCTGCACTCATCCCCTTTTCT  |
| hP2RY6      | AGCTGGGCATGGAGTTAAGA    | GCTGACTGGGACCTCTCAAG     |
| hP2RY11     | CCTCTACGCCAGCTCCTATG    | CACTGCGGCCATGTAGAGTA     |
| hP2RY12     | TTTGCCCGAATTCCTTACAC    | ATTGGGGCACTTCAGCATA      |
| hP2RY13     | CCCCTGGTACACTTGAAGA     | TACAGAGGAGGGGGTATTG      |
| hP2RY14     | TCTTTGGGCTCATCAGCTTT    | TCCGTCCAGTTCACCTTTTC     |
| mP2RX1      | CATGGGGACAGCTCCTTTGT    | GAGTGCAGCCACTGTCATCT     |
| mP2RX2      | CCAAGGCACCCCTCAAGTAG    | CTCTGCCCTTCTCCCAAAG      |
| mP2RX3      | TGCTTCAACCAACCCAGTGT    | TAAGAGCCCCTCTTCTCCCC     |
| mP2RX4      | CCTGGCTTACGTCATTGGGT    | AAGTGTGGTACAGCCACA       |
| mP2RX5      | TCTACTGCCCATCTTCCGA     | ATAGTGTGGGTTGCAGTGGG     |
| mP2RX6      | GCTGCACCATGGACCTACTT    | GCTTCAGGTGAGCTGTTCT      |
| mP2RX7      | GCACGAATTATGGCACCGTC    | CCCCACCCTCTGTGACATTC     |
| mP2RY1      | TTATGTCAGCGTGCTGGTGT    | ACGTGGTGTACATAGCAGGTG    |
| mP2RY2      | TCAAACCGGCTTATGGGACC    | GGCAGCTGAGGTCAAGTGAT     |
| mP2RY4      | GCTCTATCTGTTACGGGGG     | AGGGAGGAAGCAGTTGTTCCG    |
| mP2RY6      | GGGTAGTGTGTGGAGTCGTG    | AGCGAGTAGACAGGATGGGT     |
| mP2RY12     | TGCTGTACACCGTCCTGTTC    | CGGCTCCAGTTTAGCATCA      |
| mP2RY13     | GCATCAGGTGGTCAGTCACA    | GTGGGGCAAAGCAGACAAAG     |
| mP2RY14     | CCACATTGCCAGAATCCCCT    | AGCCGAGAGTAGCAGAGTGA     |



## SI Table 2

shRNA guide sequences used in the study

| Target        | Guide sequence         |
|---------------|------------------------|
| P2x4_sh849    | TTCATAGGTGAAGAAGTCGGA  |
| P2x4_sh877    | TTCCATTTTGTAGTACTTGGCA |
| Rictor_sh4860 | TAATCTTAGAACTTCTTTGCGA |
| Rictor_sh5055 | TTGTAGAACTGTACATCTTGA  |
| Raptor_sh973  | TAAGGCAACACTGACTGTCTTC |
| Raptor_sh4182 | TTGTTGATGAGCTCTCCGCTGC |
| Tgfr2         | GGCCGCTGCATATCGTCTG    |

## SI Table 3

Sequences of siRNAs used in this study

| Name                                              | Target sequence                                                                            |
|---------------------------------------------------|--------------------------------------------------------------------------------------------|
| ON-TARGET plus SMARTpool siRNA J-057667-09, Rraga | GAAUUCACCUGACGCCAAA                                                                        |
| ON-TARGET plus SMARTpool siRNA J-057667-10, Rraga | UCUUGAUUUGGACGCUAU                                                                         |
| ON-TARGET plus SMARTpool siRNA J-057667-11, Rraga | GGGACAACAUCUUCGGUAA                                                                        |
| ON-TARGET plus SMARTpool siRNA J-057667-12, Rraga | GAAAGAGCGGGUCGGGGAA                                                                        |
| ON-TARGET plus SMARTpool siRNA J-066440-05, Rragb | GCGUUUAUCGCGUCCGCUA                                                                        |
| ON-TARGET plus SMARTpool siRNA J-066440-06, Rragb | AUGUAUACGUAGGCGAUAU                                                                        |
| ON-TARGET plus SMARTpool siRNA J-066440-07, Rragb | GGAAAUGAACCUGCGGAAU                                                                        |
| ON-TARGET plus SMARTpool siRNA J-066440-08, Rragb | GCGAGAUGCCCACCGAUUU                                                                        |
| ON-TARGETplus SMARTpool siRNA J-057044-05, Rheb   | GCCAAUUUGUUGAUUCCUA                                                                        |
| ON-TARGETplus SMARTpool siRNA J-057044-06, Rheb   | GCUCGGUGAUGUGACAAUU                                                                        |
| ON-TARGETplus SMARTpool siRNA J-057044-07, Rheb   | UUAAGUUAUCCAUGGCAA                                                                         |
| ON-TARGETplus SMARTpool siRNA J-057044-08, Rheb   | CCAAGUUGAUCACGGUAAA                                                                        |
| ON-TARGETplus Non-targeting Pool                  | UGGUUUACAUGUCGACUAA,<br>UGGUUUACAUGUUGUGUGA,<br>UGGUUUACAUGUUUUCUGA,<br>UGGUUUACAUGUUUCCUA |
